# Supplementary material
Source: PubMed Central journal article supplement (PMC4010169)
Supplement: Supp_Data.pdf [file Supp_Data.pdf]

## Supplementary Material

**Claim:** Correlation between  $B(i)$ ,  $B(j)$ , the  $i^{\text{th}}$  and the  $j^{\text{th}}$  components of  $B$  is negative when  $i, j$  are alternative features, which implies the assumption that  $f(X) = f(X_{\text{swap}(i,j)})$ , and  $X$  and  $X_{\text{swap}(i,j)}$  follows the same distribution.  $X_{\text{swap}(i,j)}$  is the matrix from exchanging the  $i^{\text{th}}$  column and  $j^{\text{th}}$  column of  $X$ .

**Proof:**

Denote  $X$  as the feature vector, a  $D$  dimensional random vector, and  $Y$  is the responding variable. First we assume the ground true model is represented by the following formula.

$$Y = f(X)$$

When two genetic variants  $X_i$ ,  $X_j$  are a pair of alternative genetic variants for a responding variable, we assume that exchanging their values will not change the responding variable. Formally, it is defined as

$$f(X_{\text{swap}(i,j)}) = f(X). \quad (2)$$

We also assume  $X_{\text{swap}(i,j)}$  and  $X$  follows the same distribution. The optimal solution of a sparse model can be written as  $B$ .

$$B = \operatorname{argmin}_B [f(X) - X^T B]^2 + \lambda |B|_1. \quad (3)$$

So the solution will satisfy the following Karush–Kuhn–Tucker condition.  $\nabla_B [(Y - XB)^2 + \lambda |B|_1] = 0$  which is

$$X[X^T B - f(X)] = \nabla_B [\lambda |B|_1]. \quad (4)$$

Since  $X^T B = X_{\text{swap}(i,j)}^T B_{\text{swap}(i,j)}$  and  $f(X_{\text{swap}(i,j)}) = f(X)$ , we have the following,

$$X [X_{\text{swap}(i,j)}^T B_{\text{swap}(i,j)} - f(X_{\text{swap}(i,j)})] = \nabla_B [\lambda |B|_1].$$

We can also swap the  $i^{\text{th}}$  and  $j^{\text{th}}$  column of each side of the equation.  $X_{\text{swap}(i,j)} [X_{\text{swap}(i,j)}^T B_{\text{swap}(i,j)} - f(X_{\text{swap}(i,j)})] = \nabla_{B_{\text{swap}(i,j)}} [\lambda |B_{\text{swap}(i,j)}|_1]$ , which is

$$X [X^T B_{\text{swap}(i,j)} - X_{\text{swap}(i,j)} f(X_{\text{swap}(i,j)})] = \nabla_{B_{\text{swap}(i,j)}} [\lambda |B_{\text{swap}(i,j)}|_1].$$

Then we compute the expectation of the left side over all  $X$  and get the following equation.

$$E[XX^T] B_{\text{swap}(i,j)} - E[X_{\text{swap}(i,j)} f(X_{\text{swap}(i,j)})] = E[XX^T] B_{\text{swap}(i,j)} - E[Xf(X)] = \nabla_{B_{\text{swap}(i,j)}} [\lambda |B_{\text{swap}(i,j)}|_1]. \quad (5)$$

Therefore,  $B_{\text{swap}(i,j)}$  and  $B$  are solutions of the equation

$$E[XX^T] B - E[Xf(X)] = \nabla_B [\lambda |B|_1]. \quad (6)$$

Then from a linear convex combination of Equations (5) and (6), we can know  $(1-a)B + aB_{\text{swap}(i,j)}$ ,  $0 < a < 1$ , is also an optimal solution of the problem in Equation (3).

Because  $B(i) = B_{\text{swap}(i,j)}(j)$  and  $B(j) = B_{\text{swap}(i,j)}(i)$ , for all the model  $(1-a)B + aB_{\text{swap}(i,j)}$ , the  $i^{\text{th}}$  component is going from  $B(i)$  to  $B(j)$ , while the  $j^{\text{th}}$  component is going from  $B(j)$  to  $B(i)$ . Thus on the condition that there is a solution with  $B(i) \neq B(j)$ , the correlation coefficient of the  $i^{\text{th}}$  and the  $j^{\text{th}}$  component among all those models is  $-1$ . Q.E.D. ■
