# Supplementary material
Source: PubMed Central journal article supplement (PMC4010169)
Supplement: Supp_Table1.pdf [file Supp_Table1.pdf]

**Supplementary Table 1. The 79 CNV pairs with alternative relationship regarding the expression of 69 target genes in eQTL dataset.** The first and second columns show the Ensembl gene id and gene name of each target gene. The third, fourth, and fifth columns represent the coordinate of the first CNV of the alternative CNV pair, the Ensembl gene id and gene name of the overlapping gene for this CNV. The sixth, seventh, and eighth columns represent the coordinate of the second CNV of the alternative CNV pair, the Ensembl gene id and gene name of the overlapping gene for this CNV. The ninth column is the correlation coefficient between model weights of the CNV pairs among the 100 models. The last column shows the correlation coefficient between the genotypes of the CNV pair in the eQTL dataset.

| Target Gene    | TargetGeneName | Gene-1 CNV-1            | Gene-1 me-1   | GeneNa CNV-2            | Gene-2          | GeneName-2 | Correlation of model weights of CNV-1 and CNV-2 | Correlation of genotypes of CNV-1 and CNV-2 |
|----------------|----------------|-------------------------|---------------|-------------------------|-----------------|------------|-------------------------------------------------|---------------------------------------------|
| ENSG000000419  | DPM1           | chr20:46535412-46536783 |               | chr20:47977143-47977222 |                 |            | -0.628                                          | -0.046                                      |
| ENSG0000053438 | NNAT           | chr20:5577119-5578365   |               | chr20:57156840-57157173 |                 |            | -0.588                                          | -0.109                                      |
| ENSG0000062598 | ELMO2          | chr20:2307904-2308608   |               | chr20:47977143-47977222 |                 |            | -0.603                                          | -0.179                                      |
| ENSG0000064787 | BCAS1          | chr20:14425294-14426955 |               | chr20:23169078-23169133 |                 |            | -0.5                                            | 0.047                                       |
| ENSG0000064787 | BCAS1          | chr20:14425294-14426955 |               | chr20:57219300-57219515 |                 |            | -0.573                                          | -0.092                                      |
| ENSG0000078814 | MYH7B          | chr20:42760727-42762937 |               | chr20:43792820-43792931 |                 |            | -0.736                                          | 0.212                                       |
| ENSG0000078872 | NFS1           | chr20:57156840-57157173 |               | chr20:59407562-59407882 | ENSG0000079242  | CDH4       | -0.514                                          | 0.047                                       |
| ENSG0000080839 | RBL1           | chr20:23169078-23169133 |               | chr20:47977143-47977222 |                 |            | -0.572                                          | 0.025                                       |
| ENSG0000080845 | DLGAP4         | chr20:55038894-55039158 |               | chr20:57156840-57157173 |                 |            | -0.565                                          | 0.027                                       |
| ENSG0000087495 | PHACTR3        | chr20:40340323-40340374 |               | chr20:5482546-5482921   | ENSG0000025772  | GPCPD1     | -0.51                                           | 0.048                                       |
| ENSG0000088367 | EPB41L1        | chr20:30989312-30990430 |               | chr20:40340323-40340374 |                 |            | -0.522                                          | -0.116                                      |
| ENSG0000088888 | MAVS           | chr20:36572671-36572983 |               | chr20:40340323-40340374 |                 |            | -0.619                                          | 0.066                                       |
| ENSG0000088888 | MAVS           | chr20:36572671-36572983 |               | chr20:9097570-9097622   | ENSG00000101333 | PLCB4      | -0.545                                          | -0.114                                      |
| ENSG0000088888 | MAVS           | chr20:60004020-60004338 | ENSG000000699 | chr20:9097570-9097622   | ENSG00000101333 | PLCB4      | -0.615                                          | 0.296                                       |

|                         |         |                                 |                         |                                 |                                 |                         |        |        |       |
|-------------------------|---------|---------------------------------|-------------------------|---------------------------------|---------------------------------|-------------------------|--------|--------|-------|
| ENSG0<br>00001<br>00979 | PLTP    | chr20:149<br>28975-<br>14929305 |                         | chr20:600<br>04020-<br>60004338 | ENSG0<br>00001<br>30699         | TAF4                    | -0.654 | 0.079  |       |
| ENSG0<br>00001<br>01019 | UQCC    | chr20:403<br>40323-<br>40340374 |                         | chr20:542<br>428-<br>542481     |                                 |                         | -0.597 | -0.008 |       |
| ENSG0<br>00001<br>01040 | ZMYND8  | chr20:125<br>89936-<br>12590067 |                         | chr20:212<br>34100-<br>21236794 | ENSG0<br>00000<br>88930         | XRN2                    | -0.615 | 0.377  |       |
| ENSG0<br>00001<br>01052 | IFT52   | chr20:439<br>3322-<br>4397530   |                         | chr20:542<br>428-<br>542481     |                                 |                         | -0.577 | 0.009  |       |
| ENSG0<br>00001<br>01057 | MYBL2   | chr20:365<br>72671-<br>36572983 |                         | chr20:571<br>56840-<br>57157173 |                                 |                         | -0.544 | 0.147  |       |
| ENSG0<br>00001<br>01082 | SLA2    | chr20:133<br>7144-<br>1338814   |                         | chr20:600<br>04020-<br>60004338 | ENSG0<br>00001<br>30699         | TAF4                    | -0.566 | 0.158  |       |
| ENSG0<br>00001<br>01082 | SLA2    | chr20:352<br>49024-<br>35249335 | ENSG0<br>000011<br>8705 | RPN2                            | chr20:600<br>04020-<br>60004338 | ENSG0<br>00001<br>30699 | TAF4   | -0.524 | 0.079 |
| ENSG0<br>00001<br>01265 | RASSF2  | chr20:231<br>69078-<br>23169133 |                         | chr20:594<br>07562-<br>59407882 | ENSG0<br>00001<br>79242         | CDH4                    | -0.675 | -0.032 |       |
| ENSG0<br>00001<br>01266 | CSNK2A1 | chr20:419<br>14683-<br>41917196 |                         | chr20:427<br>60727-<br>42762937 |                                 |                         | -0.718 | 0.093  |       |
| ENSG0<br>00001<br>01290 | CDS2    | chr20:246<br>2976-<br>2463089   |                         | chr20:365<br>72671-<br>36572983 |                                 |                         | -0.606 | -0.047 |       |
| ENSG0<br>00001<br>01290 | CDS2    | chr20:246<br>2976-<br>2463089   |                         | chr20:600<br>04020-<br>60004338 | ENSG0<br>00001<br>30699         | TAF4                    | -0.541 | 0.121  |       |
| ENSG0<br>00001<br>01298 | SNPH    | chr20:542<br>428-<br>542481     |                         | chr20:572<br>19300-<br>57219515 |                                 |                         | -0.656 | 0.181  |       |
| ENSG0<br>00001<br>01310 | SEC23B  | chr20:133<br>7144-<br>1338814   |                         | chr20:548<br>2546-<br>5482921   | ENSG0<br>00001<br>25772         | GPCPD<br>1              | -0.526 | 0.127  |       |
| ENSG0<br>00001<br>01310 | SEC23B  | chr20:548<br>2546-<br>5482921   | ENSG0<br>000012<br>5772 | GPCPD<br>1                      | chr20:594<br>07562-<br>59407882 | ENSG0<br>00001<br>79242 | CDH4   | -0.551 | -0.06 |
| ENSG0<br>00001<br>01350 | KIF3B   | chr20:309<br>89312-<br>30990430 |                         | chr20:557<br>7119-<br>5578365   |                                 |                         | -0.53  | -0.148 |       |
| ENSG0<br>00001<br>01412 | E2F1    | chr20:365<br>72671-<br>36572983 |                         | chr20:374<br>3029-<br>3743453   |                                 |                         | -0.619 | 0.018  |       |
| ENSG0<br>00001<br>01443 | WFDC2   | chr20:437<br>92820-<br>43792931 |                         | chr20:583<br>15596-<br>58315721 |                                 |                         | -0.576 | -0.048 |       |

|                         |         |                                 |                         |                                 |                                 |                         |        |        |        |
|-------------------------|---------|---------------------------------|-------------------------|---------------------------------|---------------------------------|-------------------------|--------|--------|--------|
| ENSG0<br>00001<br>18705 | RPN2    | chr20:125<br>89936-<br>12590067 |                         | chr20:548<br>2546-<br>5482921   | ENSG0<br>00001<br>25772         | GPCPD<br>1              | -0.511 | 0.119  |        |
| ENSG0<br>00001<br>24151 | NCOA3   | chr20:365<br>72671-<br>36572983 |                         | chr20:527<br>26059-<br>52726372 |                                 |                         | -0.533 | -0.158 |        |
| ENSG0<br>00001<br>24155 | PIGT    | chr20:344<br>54309-<br>34454403 |                         | chr20:571<br>56840-<br>57157173 |                                 |                         | -0.611 | 0.038  |        |
| ENSG0<br>00001<br>24193 | SRSF6   | chr20:365<br>72671-<br>36572983 |                         | chr20:583<br>15596-<br>58315721 |                                 |                         | -0.518 | -0.305 |        |
| ENSG0<br>00001<br>24196 | GTSF1L  | chr20:152<br>58945-<br>15268664 |                         | chr20:365<br>72671-<br>36572983 |                                 |                         | -0.53  | 0.118  |        |
| ENSG0<br>00001<br>24203 | ZNF831  | chr20:325<br>79473-<br>32579805 | ENSG0<br>000012<br>5971 | DYNLR<br>B1                     | chr20:600<br>04020-<br>60004338 | ENSG0<br>00001<br>30699 | TAF4   | -0.574 | 0.075  |
| ENSG0<br>00001<br>24203 | ZNF831  | chr20:327<br>05522-<br>32707962 | ENSG0<br>000010<br>1464 | PIGU                            | chr20:600<br>04020-<br>60004338 | ENSG0<br>00001<br>30699 | TAF4   | -0.645 | -0.174 |
| ENSG0<br>00001<br>24243 | BCAS4   | chr20:125<br>89936-<br>12590067 |                         | chr20:571<br>56840-<br>57157173 |                                 |                         | -0.597 | 0.322  |        |
| ENSG0<br>00001<br>24243 | BCAS4   | chr20:437<br>92820-<br>43792931 |                         | chr20:571<br>56840-<br>57157173 |                                 |                         | -0.505 | -0.019 |        |
| ENSG0<br>00001<br>25533 | BHLHE23 | chr20:133<br>7144-<br>1338814   |                         | chr20:600<br>04020-<br>60004338 | ENSG0<br>00001<br>30699         | TAF4                    | -0.732 | 0.158  |        |
| ENSG0<br>00001<br>25534 | PPDPF   | chr20:365<br>72671-<br>36572983 |                         | chr20:374<br>3029-<br>3743453   |                                 |                         | -0.654 | 0.018  |        |
| ENSG0<br>00001<br>25779 | PANK2   | chr20:325<br>79473-<br>32579805 | ENSG0<br>000012<br>5971 | DYNLR<br>B1                     | chr20:527<br>26059-<br>52726372 |                         |        | -0.655 | 0.155  |
| ENSG0<br>00001<br>25844 | RRBP1   | chr20:246<br>2976-<br>2463089   |                         | chr20:365<br>72671-<br>36572983 |                                 |                         | -0.506 | -0.047 |        |
| ENSG0<br>00001<br>25844 | RRBP1   | chr20:365<br>72671-<br>36572983 |                         | chr20:594<br>07562-<br>59407882 | ENSG0<br>00001<br>79242         | CDH4                    | -0.624 | 0.173  |        |
| ENSG0<br>00001<br>25966 | MMP24   | chr20:125<br>31043-<br>12531337 |                         | chr20:813<br>5618-<br>8135800   | ENSG0<br>00001<br>82621         | PLCB1                   | -0.552 | 0.484  |        |
| ENSG0<br>00001<br>25967 | NECAB3  | chr20:376<br>9199-<br>3773144   |                         | chr20:389<br>63826-<br>38970162 |                                 |                         | -0.677 | 0.305  |        |

|                         |          |                                 |                         |                                 |                                 |                         |        |        |       |
|-------------------------|----------|---------------------------------|-------------------------|---------------------------------|---------------------------------|-------------------------|--------|--------|-------|
| ENSG0<br>00001<br>25971 | DYNLRB1  | chr20:125<br>89936-<br>12590067 |                         | chr20:600<br>04020-<br>60004338 | ENSG0<br>00001<br>30699         | TAF4                    | -0.598 | 0.175  |       |
| ENSG0<br>00001<br>30699 | TAF4     | chr20:550<br>38894-<br>55039158 |                         | chr20:571<br>56840-<br>57157173 |                                 |                         | -0.634 | 0.027  |       |
| ENSG0<br>00001<br>30702 | LAMA5    | chr20:365<br>72671-<br>36572983 |                         | chr20:611<br>95144-<br>61196060 |                                 |                         | -0.643 | 0.101  |       |
| ENSG0<br>00001<br>31067 | GGT7     | chr20:365<br>72671-<br>36572983 |                         | chr20:583<br>60111-<br>58360431 |                                 |                         | -0.538 | 0.185  |       |
| ENSG0<br>00001<br>31069 | ACSS2    | chr20:153<br>83302-<br>15383476 | ENSG0<br>000017<br>2264 | MACRO<br>D2                     | chr20:437<br>92820-<br>43792931 |                         | -0.501 | 0.213  |       |
| ENSG0<br>00001<br>32640 | BTBD3    | chr20:133<br>7144-<br>1338814   |                         | chr20:309<br>89144-<br>30993038 |                                 |                         | -0.63  | 0.049  |       |
| ENSG0<br>00001<br>32792 | CTNNBL1  | chr20:212<br>34100-<br>21236794 | ENSG0<br>000008<br>8930 | XRN2                            | chr20:542<br>428-<br>542481     |                         | -0.596 | 0.033  |       |
| ENSG0<br>00001<br>32792 | CTNNBL1  | chr20:437<br>92820-<br>43792931 |                         | chr20:542<br>428-<br>542481     |                                 |                         | -0.509 | -0.114 |       |
| ENSG0<br>00001<br>32801 | ZSWIM3   | chr20:583<br>15596-<br>58315721 |                         | chr20:600<br>04020-<br>60004338 | ENSG0<br>00001<br>30699         | TAF4                    | -0.659 | 0.15   |       |
| ENSG0<br>00001<br>49346 | SLX4IP   | chr20:538<br>68031-<br>53874061 |                         | chr20:571<br>56840-<br>57157173 |                                 |                         | -0.502 | -0.109 |       |
| ENSG0<br>00001<br>58296 | SLC13A3  | chr20:152<br>49732-<br>15251768 | ENSG0<br>000017<br>2264 | MACRO<br>D2                     | chr20:718<br>7158-<br>7187235   |                         | -0.577 | -0.111 |       |
| ENSG0<br>00001<br>68734 | PKIG     | chr20:427<br>60727-<br>42762937 |                         | chr20:550<br>38894-<br>55039158 |                                 |                         | -0.504 | -0.36  |       |
| ENSG0<br>00001<br>71700 | RGS19    | chr20:246<br>2976-<br>2463089   |                         | chr20:836<br>2041-<br>8362456   | ENSG0<br>00001<br>82621         | PLCB1                   | -0.506 | -0.121 |       |
| ENSG0<br>00001<br>71940 | ZNF217   | chr20:153<br>83302-<br>15383476 | ENSG0<br>000017<br>2264 | MACRO<br>D2                     | chr20:594<br>07562-<br>59407882 | ENSG0<br>00001<br>79242 | CDH4   | -0.512 | 0.042 |
| ENSG0<br>00001<br>85513 | L3MBTL1  | chr20:190<br>09417-<br>19009729 |                         | chr20:191<br>18062-<br>19118377 |                                 |                         | -0.551 | -0.001 |       |
| ENSG0<br>00001<br>96227 | FAM217B  | chr20:125<br>89936-<br>12590067 |                         | chr20:600<br>04020-<br>60004338 | ENSG0<br>00001<br>30699         | TAF4                    | -0.584 | 0.175  |       |
| ENSG0<br>00001<br>96476 | C20orf96 | chr20:734<br>6708-<br>7351594   |                         | chr20:909<br>7570-<br>9097622   | ENSG0<br>00001<br>01333         | PLCB4                   | -0.654 | -0.067 |       |

|                         |                                            |                         |                                 |                                 |                         |        |                  |
|-------------------------|--------------------------------------------|-------------------------|---------------------------------|---------------------------------|-------------------------|--------|------------------|
| ENSG0<br>00001<br>96775 | chr20:542<br>428-<br>542481                |                         | chr20:836<br>2041-<br>8362456   | ENSG0<br>00001<br>82621         | PLCB1                   | -0.565 | -0.21            |
| ENSG0<br>00001<br>98053 | SIRPA<br>chr20:365<br>72671-<br>36572983   |                         | chr20:611<br>95144-<br>61196060 |                                 |                         | -0.521 | 0.101            |
| ENSG0<br>00001<br>99024 | chr20:246<br>2976-<br>2463089              |                         | chr20:550<br>38894-<br>55039158 |                                 |                         | -0.581 | -0.024           |
| ENSG0<br>00002<br>03905 | chr20:594<br>07562-<br>59407882            | ENSG0<br>000017<br>9242 | CDH4                            | chr20:813<br>5618-<br>8135800   | ENSG0<br>00001<br>82621 | PLCB1  | -0.588<br>0.152  |
| ENSG0<br>00002<br>04044 | chr20:246<br>2976-<br>2463089              |                         | chr20:437<br>92820-<br>43792931 |                                 |                         | -0.601 | -0.086           |
| ENSG0<br>00002<br>07427 | SNORA51<br>chr20:212<br>34100-<br>21236794 | ENSG0<br>000008<br>8930 | XRN2                            | chr20:365<br>72671-<br>36572983 |                         |        | -0.517<br>-0.027 |
| ENSG0<br>00002<br>10445 | chr20:116<br>98413-<br>11698558            |                         | chr20:437<br>92820-<br>43792931 |                                 |                         | -0.72  | 0                |
| ENSG0<br>00002<br>12304 | SNORD12<br>chr20:325<br>79473-<br>32579805 | ENSG0<br>000012<br>5971 | DYNLR<br>B1                     | chr20:365<br>72671-<br>36572983 |                         |        | -0.648<br>0.005  |
| ENSG0<br>00002<br>12498 | SNORD86<br>chr20:116<br>98413-<br>11698558 |                         |                                 | chr20:374<br>3029-<br>3743453   |                         |        | -0.655<br>-0.051 |
| ENSG0<br>00002<br>13603 | chr20:542<br>428-<br>542481                |                         |                                 | chr20:557<br>7119-<br>5578365   |                         |        | -0.608<br>0.205  |
| ENSG0<br>00002<br>15251 | FASTKD5<br>chr20:153<br>83302-<br>15383476 | ENSG0<br>000017<br>2264 | MACRO<br>D2                     | chr20:327<br>05522-<br>32707962 | ENSG0<br>00001<br>01464 | PIGU   | -0.529<br>-0.169 |
| ENSG0<br>00002<br>16164 | chr20:403<br>40323-<br>40340374            |                         |                                 | chr20:583<br>15596-<br>58315721 |                         |        | -0.542<br>-0.114 |
| ENSG0<br>00002<br>16852 | chr20:544<br>50469-<br>54452021            |                         |                                 | chr20:611<br>95144-<br>61196060 |                         |        | -0.54<br>0.137   |
| ENSG0<br>00002<br>18176 | chr20:325<br>79473-<br>32579805            | ENSG0<br>000012<br>5971 | DYNLR<br>B1                     | chr20:414<br>58009-<br>41459206 |                         |        | -0.564<br>0.101  |
| ENSG0<br>00002<br>18548 | chr20:149<br>28975-<br>14929305            |                         |                                 | chr20:212<br>34100-<br>21236794 | ENSG0<br>00000<br>88930 | XRN2   | -0.713<br>0.361  |
